# The Impact of the Human DNA Topoisomerase II C-Terminal Domain on Activity

Emma L. Meczes<sup>1</sup>, Kathryn L. Gilroy<sup>1</sup>, Katherine L. West<sup>2</sup>, Caroline A. Austin<sup>1\*</sup>

**1** Institute for Cell and Molecular Biosciences, The University of Newcastle upon Tyne, Newcastle Upon Tyne, United Kingdom, **2** Division of Cancer Sciences and Molecular Pathology, University of Glasgow, Glasgow, United Kingdom

## Abstract

**Background:** Type II DNA topoisomerases (topos) are essential enzymes needed for the resolution of topological problems that occur during DNA metabolic processes. Topos carry out an ATP-dependent strand passage reaction whereby one double helix is passed through a transient break in another. Humans have two topoll isoforms,  $\alpha$  and  $\beta$ , which while enzymatically similar are differentially expressed and regulated, and are thought to have different cellular roles. The C-terminal domain (CTD) of the enzyme has the most diversity, and has been implicated in regulation. We sought to investigate the impact of the CTD domain on activity.

**Methodology/Principle Findings:** We have investigated the role of the human topoll C-terminal domain by creating constructs encoding C-terminally truncated recombinant topoll $\alpha$  and  $\beta$  and topoll $\alpha$ + $\beta$ -tail and topoll $\beta$ + $\alpha$ -tail chimeric proteins. We then investigated function *in vivo* in a yeast system, and *in vitro* in activity assays. We find that the C-terminal domain of human topoll isoforms is needed for *in vivo* function of the enzyme, but not needed for cleavage activity. C-terminally truncated enzymes had similar strand passage activity to full length enzymes, but the presence of the opposite C-terminal domain had a large effect, with the topoll $\alpha$ -CTD increasing activity, and the topoll $\beta$ -CTD decreasing activity.

**Conclusions/Significance:** *In vivo* complementation data show that the topoll $\alpha$  C-terminal domain is needed for growth, but the topoll $\beta$  isoform is able to support low levels of growth without a C-terminal domain. This may indicate that topoll $\beta$  has an additional localisation signal. *In vitro* data suggest that, while the lack of any C-terminal domain has little effect on activity, the presence of either the topoll $\alpha$  or  $\beta$  C-terminal domain can affect strand passage activity. Data indicates that the topoll $\beta$ -CTD may be a negative regulator. This is the first report of *in vitro* data with chimeric human topolls.

**Citation:** Meczes EL, Gilroy KL, West KL, Austin CA (2008) The Impact of the Human DNA Topoisomerase II C-Terminal Domain on Activity. PLoS ONE 3(3): e1754. doi:10.1371/journal.pone.0001754

**Editor:** Adam Yuan, Temasek Life Sciences Laboratory, Singapore

**Received:** November 21, 2007; **Accepted:** December 27, 2007; **Published:** March 12, 2008

**Copyright:** © 2008 Meczes et al. This is an open-access article distributed under the terms of the Creative Commons Attribution License, which permits unrestricted use, distribution, and reproduction in any medium, provided the original author and source are credited.

**Funding:** This work was funded by the North East Cancer Research Campaign (NECRC), the Biotechnology and Biological Sciences Research Council (BBSRC), and Newcastle University.

**Competing Interests:** The authors have declared that no competing interests exist.

\* E-mail: caroline.austin@ncl.ac.uk

## Introduction

Type II DNA topoisomerases (topo II) are essential enzymes that resolve topological problems with DNA that arise during processes such as DNA replication and transcription, and chromosome segregation. Their mechanism involves the passing of one DNA duplex through a transient covalent break in a second duplex, in an ATP-dependent reaction. Humans have two topoisomerase II isoforms,  $\alpha$  and  $\beta$ , which, while similar, have distinct patterns of expression and are thought to have different cellular roles [1]. Human topoII $\alpha$  is thought to be the isoform primarily involved with DNA replication and chromosome segregation, while human topoII $\beta$  has recently been implicated in transcriptional regulation [2–4].

While topoII isoforms show a high degree of sequence homology, approximately 70% between human topoII  $\alpha$  and  $\beta$ , this is mainly in the N-terminal three-quarters of the protein sequence where the two catalytic centres are located. The C-terminal quarter of the protein, while always highly charged, shows much more sequence diversity. The C-terminal domain has been shown to be vital for cell viability. However, as C-terminal

truncations are active *in vitro*, the essential nature of the C-terminal domain is thought to be linked to regulation [5].

Phosphorylation is a major form of regulation of human topoIIs, and has been shown to affect activity. Most modification sites are in the C-terminal domain, although a modification site at human topoII $\alpha$  residue S29 that is a substrate for protein kinase C has also been identified [6]. Phosphorylation sites have been identified in *S. cerevisiae* topoII [7]. Some of these modifications are cell cycle specific, with modification at S1354, S1357, S1364 and T1366 being increased during mitosis, and modification at positions T1259, S1273, S1270 and S1267 increasing in G1 [7].

Considering the human enzymes, phosphorylation sites have been identified in topoII $\alpha$ , with casein kinase II (CKII) being a principle kinase.  $\alpha$ S1524 was identified as a principle phosphorylation site [8]. Several studies have linked human topoII $\alpha$  phosphorylation to events at mitosis, and phosphorylation of  $\alpha$ S1212 has been shown to occur at only at mitosis [9]. Phosphorylation has been suggested to activate topoII for chromatid segregation in anaphase [10], and CKII mediated  $\alpha$ S1469 phosphorylation has been linked to chromatin condensation at prophase [11]. Additionally,  $\alpha$ T1342 has been proposed to

regulate mitotic functions [12], although another study has shown this to be phosphorylated throughout the cell cycle [13]. Human topoisomerase II phosphorylation sites, both cell cycle dependent and independent, are reviewed in Austin and Marsh, 1998 [5].

Modification by SUMO (small ubiquitin-like modifier) has also been linked to topoII regulation, with work in *S. cerevisiae* indicating that the topoII major modification sites (K1220, K1246/K1247 and K1277/K1278) again lie in the C-terminal domain [14]. In *S. cerevisiae* topoII, SUMO modification has been linked to chromosome stability, with modified topoII enriched at centromeric regions [15]. Additionally, topoII was found to be SUMO modified at metaphase, and was proposed to be essential for centromeric cohesion [14].

Work with human topo enzymes has shown that SUMO is rapidly conjugated to topoI, topoII $\alpha$  and topoII $\beta$  in response to DNA damage [16–17]. Additionally, after exposure to topoisomerase II inhibitor ICRF-193 human topoII $\beta$ , but not topoII $\alpha$  was selectively degraded by the proteasome, an activity that was abolished when the SUMO conjugating enzyme Ubc9 was knocked out. This implies that the degradation was linked to SUMO modification, and that this modification differs between the topoII $\alpha$  and topoII $\beta$  isoforms [18].

A major regulatory feature found in the C-terminal domains of topoIIs are nuclear localisation and nuclear export sequences (NLSs and NESs respectively). Without these signals, the enzyme is not able to localise to the nucleus, where it is essential during DNA replication, and cell viability is thus diminished or lost. Considering the human topoII isoforms, in topoII $\alpha$  a strong NLS is found at 1454–1497 [19–20], and consistent with this, a mutant lacking residues 1490–1492 is unable to locate to the nucleus [21]. Another moderate NLS has been found in topoII $\alpha$  at 1259–1296 [20]. In topoII $\beta$  nuclear localisation signals have been found in the C-terminal domain, with two strong NLSs have been identified at 1522–1548 and 1538–1573, with a weaker sequence at 1294–1332 [20,22]. Studies with isolated topoII $\alpha$  and  $\beta$  C-terminal domains tagged with Yellow Fluorescent Protein showed that the two were differently localised in the nucleus [23].

In human topoII $\alpha$  an NES was initially localised to the region 1018–1088 [24], and subsequently this was narrowed down to two sequences, 1017–1028 and 1054–1066, the latter of which is the stronger sequence [25]. In topoII $\beta$  an NES sequence has been identified between residues 1034–1044 [24].

Work with chimeric ‘tail swap’ proteins, where the C-terminal domain of topoII $\alpha$  or topoII $\beta$  is joined to the main body of the enzyme belonging to the opposite isoform, has been reported. A chimera of murine topoII consisting of the body of topoII $\alpha$  and the tail of topoII $\beta$  showed that this protein was unable to support growth [26]. Conversely, a study examining the ability of human topoII chimeric tail swap proteins to rescue topoII $\alpha$  cells *in vivo* found that the chimeric proteins, particularly those bearing the topoII $\alpha$  C-terminal domain, could support growth [27].

To assess whether the C-terminal domain, as the most diverse part of the protein, impacted the relative activities of topoII $\alpha$  and  $\beta$ , we aimed to construct and characterise *in vitro* and *in vivo* full length and C-terminally truncated forms of human topoII $\alpha$  and  $\beta$ , and two ‘tail swap’ chimeric proteins where the C-terminal domain of each isoform is linked to the main sequence of the opposite isoform. In contrast to a recently published study describing the *in vivo* characterisation of tail swap proteins, where the C-terminal domain boundary was determined by alignment [27], the constructs described here have boundaries chosen based on those determined by limited proteolysis [28]. The construction process, as well as subsequent characterisation, is reported here.

## Materials and Methods

### Reagents

All chemicals were purchased from Sigma, BDH or Boehringer Mannheim. Restriction enzymes were purchased from NBL Gene Sciences Ltd, New England Biolabs, or Pharmacia Biotech. T4 Ligase was purchased from Gibco BRL. Etoposide was a gift from Prof. H. Newell, NICR, Newcastle, UK. mAMSA, Merbarone and Suramin were obtained from the Drug Synthesis and Chemistry branch, NCI, Bethesda, MD. Quercetin, Quercetagenin, Myricetin and Baicalein were provided by Prof. L.M. Fisher. mAMCA, DACA and Cl-DACA were provided by Prof. B Baguley, Auckland Cancer Society, New Zealand. All other cytotoxics were purchased from Sigma.

### Plasmids and Yeast Strains

*S. cerevisiae* strain JEL1 was used for overexpression of proteins. Yeast strain JN394t2-4, a temperature sensitive strain that is viable at 25°C but non-viable at 35°C, was used in complementation analysis.

All of the plasmids encoding topoII isoforms express protein under the control of the GAL1 promoter, and have a URA3 marker gene, the yeast 2 $\mu$  plasmid replication origin and the  $\beta$ -lactamase gene and replication origin of *E. coli* pBR322 are also present. Plasmid YEpWob6, used to express recombinant human topoII $\alpha$ , encodes the first 5 amino acids of *S. cerevisiae* topoII fused to residues 29–1531 of human topoII $\alpha$ . Plasmid YEphTOP2 $\beta$  encodes recombinant human topoII $\beta$  with the S165R mutation, with residues 46–1621 fused to the first 5 amino acids of *S. cerevisiae* topoII [29–30]. Plasmid YEphTOP2 $\beta$ KLM encodes recombinant wild type topoII $\beta$  residues 46–1621 (without mutation S165R) fused to the first 5 of *S. cerevisiae* topoII. Plasmid intermediates used in the cloning process to construct C-terminal truncations and tail swaps are described in the ‘Results’ section and figure legends.

### Construction of mutant plasmids

Plasmids encoding truncated topoII $\alpha$  and topoII $\beta$ , as well as two ‘tail swap’ chimeric proteins with the opposite C-terminal domain fused to the main coding sequence were constructed as described in ‘Results’. In all cases restriction digests were carried out according to manufacturer’s instructions. Fragments were separated by agarose gel electrophoresis and then purified using a QIAquick Gel extraction spin column. Ligations were then carried out using T4 ligase and the manufacturer’s buffers, incubating with 0.5mM ATP for 16 hours at 4°C.

Tail swap mutants were constructed with triple cloning procedures, then the junction sites were confirmed by sequencing both strands with dideoxy DNA sequencing using appropriate primers and a Sequenase version 2.0 DNA sequencing kit (Amersham).

### Preparation of protein

Recombinant human topoII $\alpha$  and  $\beta$  proteins were expressed and purified as described previously [28,31]. ATP dependent and independent relaxation assays were done with purified fractions to identify those free of topoI activity.

### *In vitro* assays

Decatenation assays and cleavage assays with an end-labelled 4.3 kb linear DNA fragment from pBR322 were done as described previously [29–30].

### *In vivo* assays

Complementation assays were carried out in a temperature sensitive yeast strain JN394t2-4, and plasmids encoding topoII $\alpha$

and topoII $\beta$  (WT and S165R) full length, C-terminally truncated or chimeric proteins. Yeast were grown in Ura<sup>-</sup> selective media at the permissive temperature (25°C) to an OD<sub>600</sub> of 1, and then serially diluted in sterile microtitre trays. These cultures were then transferred to plates with an aluminium replicator, then incubated at the permissive, semi-permissive and non-permissive (25°C, 30°C or 35°C) temperatures respectively on glucose containing media, then growth was scored.

## Results

### Construction of plasmids

Truncations at the 3' end of the coding sequence of topoII $\alpha$  and topoII $\beta$  (S165R) were constructed from plasmids YEpWob6 and YEpTOP2 $\beta$  respectively. The truncated topoII $\alpha$  plasmid encodes residues 29–1242 and the truncated topoII $\beta$  plasmid encodes residues 46–1263, these being the start of the C-terminal domains as determined by limited proteolysis experiments [28,32,33]. Schematics of these plasmids are shown in Figure 1.

In the construction of C-terminally truncated topoII $\alpha$ , PCR was used to introduce a PstI restriction site in the human topoII $\alpha$  coding sequence and then to generate the full coding sequence. A fragment was generated between codon 791 (over a KpnI site) and codon 1244 (over the PstI site introduced above) of topoII $\alpha$ . The PCR product was cloned into a Bluescript plasmid with a XhoI site immediately 3' to the 792–1242 fragment, then excised by

digestion with KpnI and XhoI. This was then cloned into the YEpWob6 plasmid, replacing the fragment 792–1531.

In the construction of C-terminally truncated topoII $\beta$ , multiple internal restriction sites in the topoII $\beta$  sequence meant that a complex cloning procedure was necessary. A fragment containing topoII $\beta$  residues 900–1263 was excised and cloned into a Bluescript plasmid between BamHI and PstI restriction sites, this having a XhoI site 36 residues downstream of the PstI site. A fragment between BamHI to the XhoI beginning at codon 900 was excised and cloned into a vector containing topoII $\beta$  codons 46–899 plus the YEp backbone.

Plasmids encoding chimeric 'tail-swap' proteins were created using a triple ligation approach and PCR to generate unique sites. Construction of the topoII $\alpha$ + $\beta$  tail plasmid, encoding topoII $\alpha$  residues 30–1244 fused to topoII $\beta$  residues 1263–1621, is illustrated in figure 2A. Likewise, construction of the topoII $\beta$  (S165R)+ $\alpha$  tail plasmid, encoding topoII $\beta$  residues 46–1263 fused to topoII $\alpha$  residues 1244–1531, is illustrated in figure 2B.

All topoII $\beta$  constructs containing the S165R mutation were changed to give wild type sequence by site directed mutagenesis using a Chameleon kit (stratagene) according to manufacturer's instructions.

### Topoll protein activities

The decatenation activity of wild type topoII $\alpha$ , C-terminally truncated topoII $\alpha$ , and topoII $\alpha$ + $\beta$  tail was assayed. The values for 50% decatenation (D<sub>50</sub>), in ng of protein, are shown in figure 3A. There is no significant difference in D<sub>50</sub> between topoII $\alpha$  and its C-terminal truncation, with values of 4.5±1.3 and 6±1 ng of protein respectively. The topoII $\alpha$ + $\beta$  tail chimera however does show a significant reduction in decatenation as compared to full length topoII $\alpha$ , with a D<sub>50</sub> of 29±1 (p=0.0008 in a two-tailed unpaired student t-test). This implies that while topoII $\alpha$  can function perfectly well without a C-terminal domain, the  $\beta$ -tail on the topoII $\alpha$  enzyme impedes activity.

It is possible that the observed reduction in catalytic activity seen with the topoII $\alpha$ + $\beta$  tail chimeric protein was an artefact, caused by the insertion of the tail into the enzyme altering a property such as conformation. A chimeric protein of topoII $\beta$  mutant S165R, known to give a 5-fold reduction in decatenation activity [34], fused to the  $\alpha$ -tail, was used to address this concern. If the insertion of the tail *per se* impedes catalytic activity, then the topoII $\beta$  (S165R)+ $\alpha$  tail would be expected to have still lower decatenation activity than topoII $\beta$ (S165R). As shown in figure 3A the presence of the  $\alpha$  tail gave no reduction in the decatenation activity of topoII $\beta$ (S165R). As with topoII $\alpha$ , removing the topoII $\beta$  C-terminal domain gave no significant difference in activity, with D<sub>50</sub> values of 50±8 and 60±8 ng protein for topoII $\beta$ (S165R) and C-terminally truncated topoII $\beta$ (S165R) respectively. The activity of the topoII $\beta$ (S165R)+ $\alpha$  tail chimera was increased very slightly with a D<sub>50</sub> of 41.5±0.5 ng protein, however this difference was not statistically significant (p=0.4001, figure 3A).

### Complementation analysis of isoforms

To assess the *in vivo* functional activity of the truncated and chimeric proteins, complementation experiments were carried out in the temperature sensitive yeast strain JN394*t2-4*. Data are shown in table 1. All of the topoII $\beta$  (S165R) plasmids were unable to complement at the restrictive temperature, consistent with previous results [34]. Both wild type topoII isoforms supported good growth as expected. The truncated topoII $\alpha$  and topoII $\alpha$ + $\beta$  tail proteins were unable to complement, but interestingly the truncated topoII $\beta$  and topoII $\beta$ + $\alpha$  tail proteins were able to support low levels of growth.

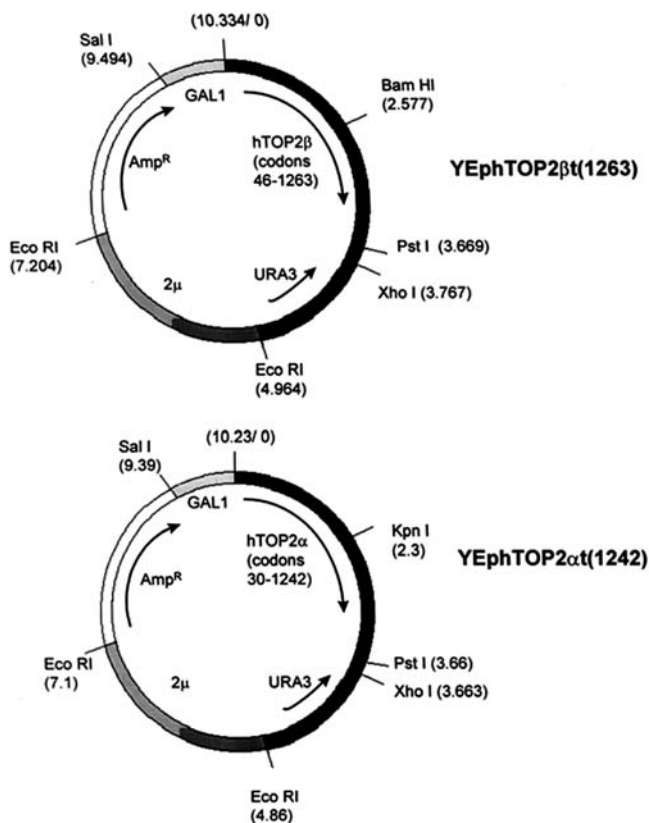

**Figure 1. Schematic of C-terminally truncated topoll $\alpha$  and topoll $\beta$  constructs.** Shown are the topoll sequence boundaries, the GAL1 promoter, the 2 $\mu$  replication origin, the URA3 marker gene, and an ampicillin resistance gene. Restriction sites used in plasmid construction are indicated.

doi:10.1371/journal.pone.0001754.g001

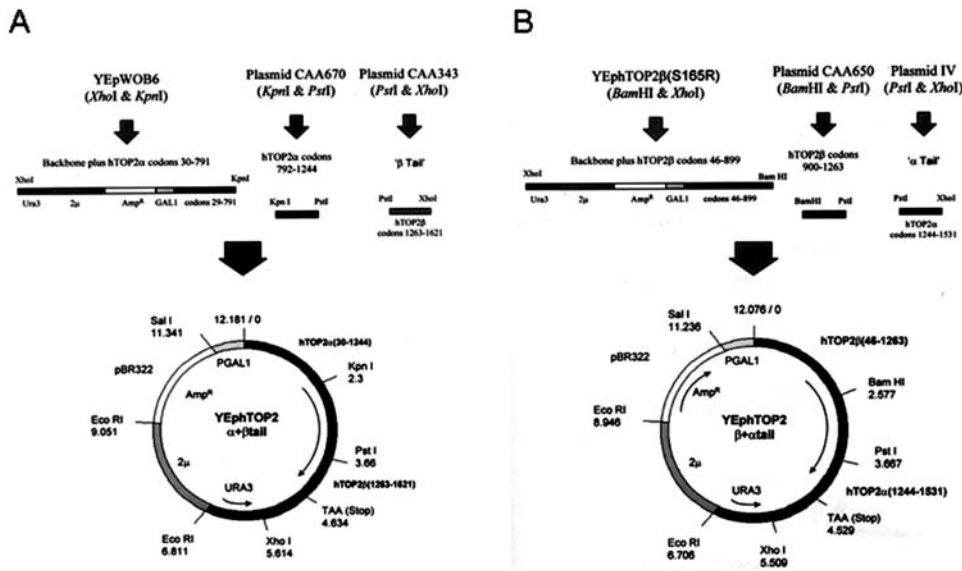

**Figure 2. Construction of chimeric ‘tail-swap’ plasmids.** A—construction of topoll $\alpha$ + $\beta$  tail. Topoll $\alpha$  fragments 30–791 and 792–1244 and topoll $\beta$  fragment 1263–1621 were generated using restriction digests as shown, then ligated to give the final construct shown. B—construction of topoll $\beta$ + $\alpha$  tail. Topoll $\beta$  fragments 46–899 and 900–1263 and topoll $\alpha$  fragment 1244–1531 were generated with restriction digests as indicated, then ligated to give the final construct shown [32]. doi:10.1371/journal.pone.0001754.g002

**Cleavage assays with tail swaps**

The cleavage activity of each of the wild type and C-terminal truncation mutant proteins was assessed in an end-labelled cleavage assay, in the presence and absence of drug. While the topoll $\beta$  proteins here had mutation S165R this has been shown to have no effect on cleavage under the conditions used [34]. In the absence of drug all six proteins gave cleavage at similar sites (data not shown). While topoll $\alpha$  gave cleavage at more sites than topoll $\beta$  this difference wasn’t statistically significant. The same pattern was seen with the truncated and tail swap proteins, with topoll $\alpha$  proteins generally giving slightly more cleavage than their topoll $\beta$  counterpart, however this difference wasn’t significant.

Drug stimulated cleavage was assayed with flavonoids quercetin, quercetagenin, myricetin, and baicalein, acridines mAMSA and mAMCA, etoposide and mitoxantrone. No difference in cleavage pattern between proteins was seen with drugs with the exception of

truncated topoll $\beta$  which promoted cleavage with mAMCA sites corresponding to a combination of topoll $\beta$  and topoll $\alpha$ . Additionally truncated topoll $\beta$  promoted no cleavage with mitoxantrone (figure 3B), and topoll $\alpha$ + $\beta$  tail promoted cleavage with quercetagenin at sites more in common with topoll $\beta$  than topoll $\alpha$ . This indicates that the C-terminal domain of topoll $\beta$  has a role in the determination of cleavage sites with certain drugs.

**Discussion**

Human topoll isoforms  $\alpha$  and  $\beta$ , while enzymatically similar *in vitro*, have been shown to have different cellular roles. While topoll $\alpha$  is thought to be the isoform primarily responsible for DNA segregation, topoll $\beta$  has recently been linked to transcription initiation [2–4]. Here we report the construction and characterisation of recombinant truncated and tail swap chimeric proteins.

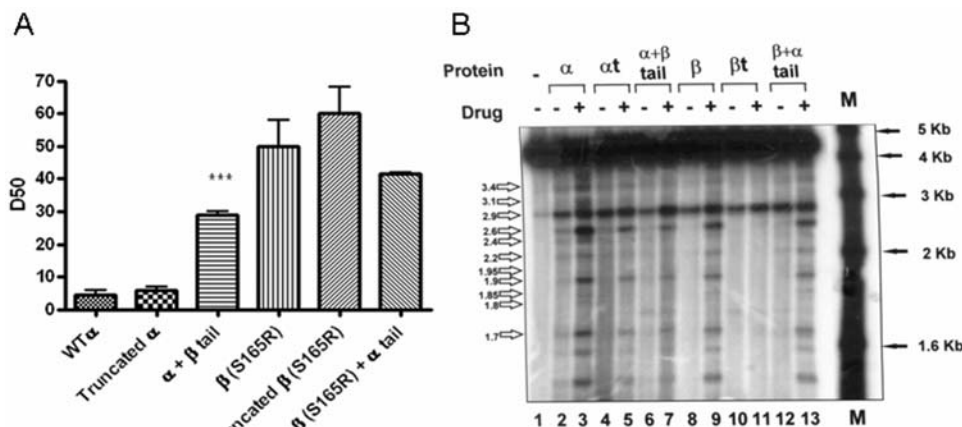

**Figure 3. Activity of recombinant proteins.** A: Decatenation activity of all proteins, each column is the mean of at least two independent experiments. Standard errors are shown, with significant difference from full length enzyme marker with ‘\*\*\*’. B: Representative cleavage experiment with 4.3 kb linearised pBR322 DNA with all proteins in the presence of mitoxantrone. Topoll $\beta$  proteins in this case carry the S165R mutation. doi:10.1371/journal.pone.0001754.g003

**Table 1.** Complementation of topoll isoforms

|                                       | 25 °C | 30 °C | 35 °C |
|---------------------------------------|-------|-------|-------|
| Topoll $\alpha$                       | ++    | ++    | ++    |
| Topoll $\alpha$ truncated             | +++   | +++   | -     |
| Topoll $\alpha$ + $\beta$ tail        | ++    | ++    | -     |
| Topoll $\beta$                        | ++    | ++    | ++    |
| Topoll $\beta$ (S165R)                | ++    | ++    | -     |
| Topoll $\beta$ truncated              | ++    | ++    | +/-   |
| Topoll $\beta$ (S165R) truncated      | ++    | +     | -     |
| Topoll $\beta$ + $\alpha$ tail        | ++    | ++    | +/-   |
| Topoll $\beta$ (S165R)+ $\alpha$ tail | ++    | ++    | -     |

- no growth, +/- poor growth, +some growth, ++ good growth, +++ excellent growth

All experiments were repeated at least twice.

doi:10.1371/journal.pone.0001754.t001

Whilst truncated human topoll $\alpha$  has been reported previously, the point of truncation in this case was chosen to align with a viral topoll lacking the C-terminal domain [35]. C-terminal truncations of topoll $\alpha$  and  $\beta$  reported here were based on domain organisation as determined by the cleavage sites in limited proteolysis studies [28]. Likewise, human chimeric tail swap proteins have been described and their *in vivo* function reported, but these also had domain boundaries based on alignment rather than proteolysis sites [27]. Here we report, for the first time, the creation of C-terminally truncated recombinant human topoll proteins based on domain structure indicated by limited proteolysis experiments. Furthermore, we have also created chimeric recombinant human topoll tail swap proteins based on this definition of the C-terminal domain. Additionally, this manuscript is the first report of characterisation of the *in vitro* function of human chimeric tail swap proteins.

Complementation analysis showed, as previously reported, that the S165R mutant proteins were not functional *in vivo* [34]. The topoll $\alpha$  C-terminal truncation couldn't support growth, in accordance with previous work showing that the loss of the C-terminal domain, and the localisation signals within it, are detrimental to growth [26,36]. The topoll $\alpha$ + $\beta$  chimera was also unable to support growth suggesting that the  $\beta$  C-terminal domain is unable to restore the localisation of the enzyme, or perhaps that the topoll $\beta$  C-terminal domain has a different function to the topoll $\alpha$  C-terminal domain. This would be consistent with previous experiments showing that human topoll $\alpha$  preferentially relaxes positive supercoils, whereas topoll $\beta$  showed no preference [37]. This result is in contrast to a study with a murine topoll $\alpha$ + $\beta$  protein which was able to support growth in *S. cerevisiae* strain NAY113 [26]. This difference could be species specific, or due to differences in the definition of the start of the C-terminal domain. In the murine study the last 444 amino acids of the  $\beta$ -tail were used to replace the equivalent region on topoll $\alpha$ , in contrast to 358 residues here, with 356 amino acids of the topoll $\alpha$  tail lost in the murine chimera in contrast to 289 here.

Perhaps more surprising is that topoll $\beta$  truncated protein and topoll $\beta$ + $\alpha$  tail protein can support low levels of growth, implying that some localisation to the nucleus is still present. Known nuclear localisation signals are shown in figure 4 and, with the exception of *S. pombe* topoll which also has an N-terminal signal, all sequences are found in the C-terminal domain [20,22,38,39]. It is therefore unclear why the truncated topoll $\beta$  protein is able to support low

levels of growth (and hence localise, albeit inefficiently, to the nucleus), but it is possible that this is due to a presently unknown mechanism, perhaps linked to topoll $\beta$  specific modification, or an unidentified NLS specific to topoll $\beta$ . This would be consistent with previous work that showed that the topoll $\alpha$  and  $\beta$  C-terminal domains were differently localised [23].

A previous study into human chimeric enzymes found that proliferation of topoll $\alpha$  knockout human cells was supported in all cases by enzymes bearing the topoll $\alpha$  C-terminal domain, but that proliferation was only supported rarely and when protein was expressed in large quantities for enzymes bearing the topoll $\beta$  C-terminal domain. The relative levels of growth support are consistent with the data presented here (where the topoll $\alpha$  C-terminal domain chimera supports low levels of growth and the topoll $\beta$  C-terminal domain chimera supports no growth at all), although the levels of growth differ, perhaps because of differences in the experimental systems or the sensitivity of methods [27].

The decatenation data imply that the topoll C-terminal domain is involved in the modulation of catalytic activity in the two human isoforms. The truncated topoll proteins had no difference in *in vitro* decatenation activity as compared to their full length counterparts suggesting that the C-terminal domain is not necessary for *in vitro* activity, which is consistent with previous data [26,40,41]. While the absence of the C-terminal domain for topoll $\alpha$  or  $\beta$  had no effect on strand passage activity, the presence of the C-terminal domain from the opposite isoform had a noticeable effect with a clear trend emerging. The presence of the  $\beta$ -tail on the topoll $\alpha$  isoform core gave a statistically significant decrease in strand passage activity compared to the native topoll $\alpha$  protein, and the presence of the  $\alpha$ -tail on the topoll $\beta$  isoform core gave an increase in activity compared to the native topoll $\beta$  protein, although this time not significant, towards that of the native topoll $\alpha$  protein. As the truncated forms of each protein had no difference in activity when compared to the full length, this implies that it is the presence of the  $\alpha$  or  $\beta$  tail that is important for the level of strand passage, acting as a regulator. In this case of the topoll $\beta$  C-terminal domain particularly, this regulation (negative in this case), is quite striking. While it can't formally be excluded that the reduced activity of the chimeric topoll $\alpha$ + $\beta$  tail protein is due to the tail swap process, this seems unlikely, as if the process itself reduced activity this should also be seen with the topoll $\beta$ (S165R)+ $\alpha$  tail protein. In fact the opposite is seen, with the absence of the  $\beta$ -CTD seeming to 'release' the enzyme activity a little and increase the rate of decatenation.

The regulation of catalytic activity by the C-terminal domain could be mediated via differential modification, for instance phosphorylation or SUMOylation, or could be linked to the extensive differences in primary sequence between the two C-terminal domains.

Observations reported previously support the hypothesis that topoll $\alpha$  and  $\beta$  C-terminal domains are important in differential regulation of the isoforms. All of the SUMO modification sites identified to date have been located in the C-terminal domain of topoll [14]. SUMO conjugation to topoll, topoll $\alpha$  and topoll $\beta$  has also been linked to the human cellular response to DNA damage [16–17]. However, differential degradation of topoll $\beta$  but not topoll $\alpha$  was observed in response to treatment with ICRF-193, strongly suggesting that the two isoforms are regulated differently by SUMO modification [18].

An analysis of the theoretical protein parameters of full length and truncated topoll $\alpha$  and topoll $\beta$ , and their tail swap derivatives, is shown in table 2. What is immediately obvious is that, while the full length and truncated topoll isoforms all have similar

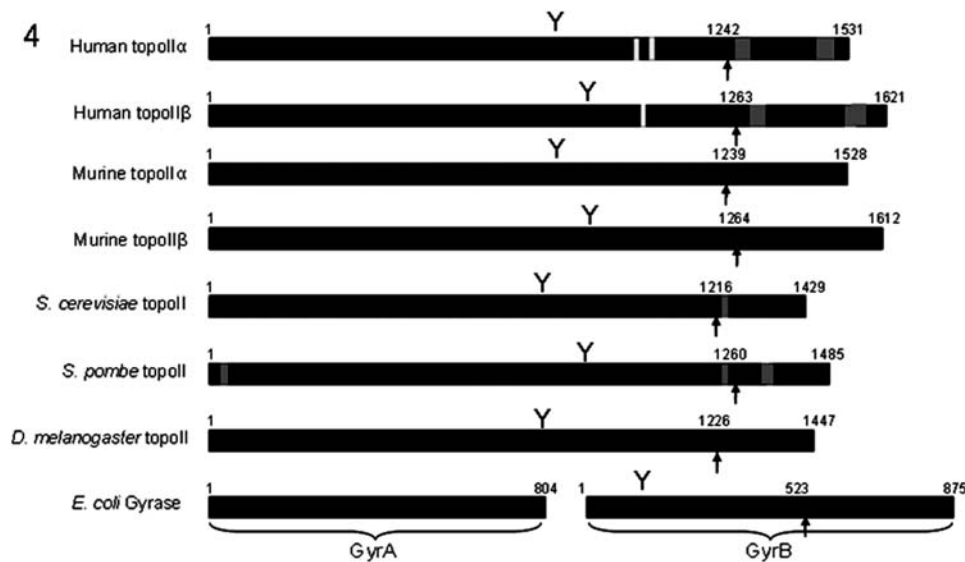

**Figure 4. Schematic showing the position of the C-terminal domain of type II topoisomerases.** Above each bar are the residue numbers at the start and end of the primary sequence, plus the point equating to the start of the C-terminal domain (indicated by arrows), as determined by limited proteolysis where known, and by alignment with this point where this is not known. Also shown are active site tyrosines (Y), known nuclear localisation sequences (NLS—dark grey) and known nuclear export sequences (NES—light grey). NLS sequences have been identified in human topoll $\alpha$  (1259–1296, 1454–1497 [20]), human topoll $\beta$  (1294–1332, 1522–1548, 1538–1573 [20]), *S. cerevisiae* topoll (1227–1242 [38]) and *S. pombe* (26–44, 1227–1242, 1322–1339, 1335–1357 [39]). NES sequences have been identified in human topoll $\alpha$  (1017–1028, 1054–1066 [24]) and human topoll $\beta$  (1034–1044 [24]).

doi:10.1371/journal.pone.0001754.g004

theoretical pIs, with full length topoII $\beta$  having a slightly lower theoretical pI, the theoretical pI of the isolated C-terminal domain of topoII $\beta$  is considerably lower than other topoII proteins. This is linked to the higher number of acidic residues compared to basic residues seen with this fragment. Unsurprisingly, the  $\alpha+\beta$  tail protein has a lower theoretical pI than full length topoII $\alpha$ , and the  $\beta+\alpha$  tail protein has a higher theoretical pI than the full length topoII $\beta$  protein, but a similar pI to the truncated topoII $\beta$  protein [42]. It would thus appear that the lower theoretical pI of the  $\beta$ -CTD acts to lower the pI of the core protein to which it is attached. Conversely, the addition of the  $\alpha$ -CTD has little effect on either core protein's theoretical pI.

Cleavage data suggests that the C-terminal domain is not generally involved in cleavage, although there was a consistent, yet non-significant, increase in cleavage with the topoII $\alpha$  derived proteins. Most drugs showed no difference in drug-stimulated

cleavage patterns between topoII $\alpha$  and  $\beta$ , implying that the C-terminal domain has no impact on the action of these drugs, consistent with previous work showing that topoII $\alpha$  and topoII $\beta$  cleave at similar sites [43]. There were exceptions to this rule however, for example the truncated topoII $\beta$  showed no cleavage with mitoxantrone, showing that some drugs may have specific interactions that involve the C-terminal domain of human topoII $\beta$ .

In summary, we report the construction of C-terminally truncated and chimeric human topoII enzymes, and show that the C-terminal domain impacts on the activity of the two human isoforms. Further characterisation of human topoII $\alpha$  and topoII $\beta$ , perhaps by investigating the effect of SUMOylation on either isoform, or the cellular localisation of these tail swap proteins, will be needed to elucidate their different interactions with DNA substrates and functional roles in cells.

**Table 2. Protein parameters for human topoll isoforms**

|                                | Amino acids | Theoretical pI | Acidic amino acids | Basic amino acids |
|--------------------------------|-------------|----------------|--------------------|-------------------|
| Topoll $\alpha$                | 1–1531      | 8.82           | 226 (14%)          | 246 (16%)         |
| Topoll $\beta$                 | 1–1621      | 8.22           | 243 (15%)          | 250 (15%)         |
| Truncated topoll $\alpha$      | 1–1242      | 8.71           | 173 (14%)          | 187 (15%)         |
| Truncated topoll $\beta$       | 1–1263      | 8.83           | 163 (13%)          | 185 (15%)         |
| $\alpha$ CTD                   | 1243–1531   | 9.09           | 53 (18%)           | 59 (20%)          |
| $\beta$ CTD                    | 1264–1621   | 5.04           | 77 (22%)           | 65 (18%)          |
| Topoll $\alpha$ + $\beta$ tail | 1–1600      | 7.69           | 250 (16%)          | 252 (16%)         |
| Topoll $\beta$ + $\alpha$ tail | 1–1552      | 8.9            | 219 (14%)          | 244 (16%)         |

Shown are the residues of the protein, the theoretical pI and number of acidic (negatively charged, D,E) and basic (positively charged, R,K) amino acids. Shown in parentheses is the percentage of amino acids with each charge in each protein. Reproduced and modified from KL Gilroy, thesis [42].

doi:10.1371/journal.pone.0001754.t002

## Acknowledgments

We acknowledge Margaret Bell for technical assistance.

## References

- Corbett KD, Berger JM (2004) Structure, Molecular Mechanisms and Evolutionary Relationships in DNA Topoisomerases. *Annu Rev Biophys Biomol Struct* 33: 95–118.
- Ju B-G, Lunyak VV, Perissi V, Garcia-Bassets I, Rose DW, et al. (2006) A Topoisomerase II $\beta$ -Mediated dsDNA Break Required for Regulated Transcription. *Science* 312: 1798–1802.
- Kitagawa H, Fujiki R, Yoshimura K, Mezaki Y, Uematsu Y, et al. (2003) The chromatin-remodelling complex WINAC targets a nuclear receptor to promoters and is impaired in Williams syndrome. *Cell* 113: 905–917.
- Ju B-G, Solum D, Song EJ, Lee K-J, Rose DW, et al. (2004) Activating the PARP-1 sensor component of the groucho/TLE1 corepressor complex mediates a CaMKII $\delta$ -dependent neurogenic gene activation pathway. *Cell* 119: 815–829.
- Austin CA, Marsh KL (1998) Eukaryotic DNA topoisomerase II $\beta$ . *Bioessays*. 20: 215–226.
- Wells NJ, Fry AM, Guano F, Norbury C, Hickson ID (1995) Cell cycle phase-specific phosphorylation of human topoisomerase II alpha: Evidence of a role for protein kinase C. *J. Biol. Chem.* 270: 28357–28363.
- Cardenas ME, Dong Q, Glover CVC, Gasser SM (1992) Casein kinase II phosphorylates the eukaryotic-specific C-terminal domain of topoisomerase II in vivo. *The EMBO J* 11: 1785–1796.
- Wells NJ, Addison CM, Fry AM, Ganapathi R, Hickson ID (1994) Serine 1524 Is a Major Site of Phosphorylation on Human Topoisomerase II $\alpha$  Protein in vivo and is a Substrate for Casein Kinase II in vitro. *J Biol Chem* 269: 29746–29751.
- Ishida R, Takashima R, Koujin T, Shibata M, Nozaki N, et al. (2001) Mitotic Specific Phosphorylation of Serine-1212 in Human DNA Topoisomerase II $\alpha$ . *Cell Struct Func* 26: 215–226.
- Heck MMS, Hittelman WN, Earnshaw WC (1989) In vivo phosphorylation of the 170 kDa Form of Eukaryotic DNA Topoisomerase II: Cell Cycle Analysis. *J Biol Chem* 264: 15161–15164.
- Escargueil AE, Plisov SY, Cochet C, Larsen AK (2000) Mitotic Phosphorylation of DNA Topoisomerase II $\alpha$  by Protein Kinase CK2 Creates the MPM-2 Phosphoepitope on Ser-1469. *J Biol Chem* 275: 34710–34718.
- Daum JR, Gorbisky GJ (1998) Casein Kinase II Catalyses a Mitotic Phosphorylation on Threonine 1342 of Human DNA Topoisomerase II $\alpha$ , Which Is Recognised by the 3F3/2 Phosphoepitope Antibody. *J Biol Chem* 273: 30622–30629.
- Ishida A, Iwai M, Marsh KL, Austin CA, Yano T, et al. (1996) Threonine 1342 in Human Topoisomerase II $\alpha$  Is Phosphorylated Throughout the Cell Cycle. *J Biol Chem* 271: 30077–30082.
- Bachant J, Akasabas A, Blat Y, Kleckner N, Elledge SJ (2002) The SUMO-1 Isopeptidase Smt4 is Linked to Centromeric Cohesion through SUMO-1 Modification of DNA Topoisomerase II. *Mol Cell* 9: 1169–1182.
- Takahashi Y, Yong-Gonzalez V, Kikuchi Y, Strunnikov A (2006) SIZ1/SIZ2 Control of Chromosome Transmission Fidelity Is Mediated by the Sumoylation of Topoisomerase II. *Genetics* 172: 783–794.
- Mao Y, Desai SD, Liu LF (2000) SUMO-1 Conjugation to Human DNA Topoisomerase II Isozymes. *J Biol Chem* 275: 26066–26073.
- Azuma Y, Arnaoutov A, Dasso M (2003) SUMO-2/3 regulates topoisomerase II in mitosis. *J Cell Biol* 163: 477–487.
- Isik S, Sano K, Tsutsui K, Seki M, Enomoto T, et al. (2003) The SUMO pathway is required for selective degradation of DNA topoisomerase II $\beta$  induced by a catalytic inhibitor ICRF-193. *FEBS Lett* 546: 374–378.
- Mirski SEL, Gerlach JH, Cummings HJ, Zirngibl R, Greer PA, et al. (1997) Bipartite Nuclear Localisation Signals in the C-terminus of Human Topoisomerase II $\alpha$ . *Exp Cell Res* 237: 452–455.
- Mirski SE, Gerlach JH, Cole SP (1999) Sequence determinants of nuclear localisation in the alpha and beta isoforms of human topoisomerase II. *Exp. Cell Res.* 251: 329–339.
- Wessel I, Jensen PB, Falck J, Mirski SEL, Cole SPC, et al. (1997) Loss of amino acids 1490Lys-Ser-Lys1492 in the COOH-Terminal region of topoisomerase II $\alpha$  in Human Small Cell Lung Cancer cells selected for resistance to etoposide results in extranuclear enzyme localisation. *Cancer Res* 57: 4451–4454.
- Cowell IG, Willmore E, Chalton D, Marsh KL, Jazrawi E, et al. (1998) Nuclear distribution of human DNA topoisomerase IIbeta: a nuclear targeting signal resides in the 116-residue C-terminal tail. *Exp. Cell Res.* 243: 232–240.
- Sakaguchi A, Akashi T, Kikuchi A (2001) A distinct subcellular localisation of mammalian DNA topoisomerase IIbeta in yeast. *Biochem. Biophys. Res. Comm.* 283: 876–882.
- Mirski SE, Bielawski JC, Cole SP (2003) Identification of functional nuclear export sequences in human topoisomerase II alpha and beta. *Biochem. Biophys. Res. Commun.* 306: 905–911.
- Turner JG, Engel R, Derderian JA, Jove R, Sullivan DM (2004) Human topoisomerase II $\alpha$  nuclear export is mediated by two CRM-1-dependent nuclear export signals. *J Cell Sci* 117: 3061–3071.
- Adachi N, Miyaie M, Kato S, Kanamara R, Koyama H, et al. (1997) Cellular distribution of mammalian DNA topoisomerase II is determined by its catalytically dispensable C-terminal domain. *Nucleic Acids Res.* 25: 3135–3142.
- Linka RM, Porter AC, Volkov A, Mielke C, Boege F, et al. (2007) C-terminal regions of topoisomerase IIalpha and IIbeta determine isoforms-specific functioning of the enzymes in vivo. *Nucleic Acids Res.* 35: 810–822.
- Austin CA, Marsh KL, Wasserman RA, Willmore E, Sayer PJ, et al. (1995) Expression, Domain Structure and Enzymatic Properties of an Active Recombinant Human DNA Topoisomerase II $\beta$ . *J. Biol. Chem.* 270: 15739–15746.
- Gilroy KL, Leontiou C, Padget K, Lakey JH, Austin CA (2006) mAMSA resistant human topoisomerase II $\beta$  mutation G465D has reduced ATP hydrolysis activity. *Nucleic Acid Res.* 34: 1597–1607.
- Leontiou C, Lakey JH, Austin CA (2004) Mutation E522K in Human DNA Topoisomerase II $\beta$  Confers Resistance to Methyl N-(4'-(9-acridinylamino)-phenyl)carbamate hydrochloride and Methyl N-(4'-(9-acridinylamino)-3-methoxy-phenyl)methane sulfonamide but Hypersensitivity to Etoposide. *Mol. Pharm.* 66: 430–439.
- Wasserman RA, Austin CA, Fisher LM, Wang JC (1993) Use of yeast in the study of anticancer drugs targeting DNA topoisomerases: expression of a functional recombinant human DNA topoisomerase II alpha in yeast. *Cancer Res* 53: 3591–3596.
- Meczes EL (1998) PhD Thesis.
- Meczes EL, Marsh KL, Fisher LM, Rogers MP, Austin CA (1997) Complementation of temperature-sensitive topoisomerase II mutations in *Saccharomyces cerevisiae* by a human TOP2 $\beta$  construct allows the study of topoisomerase II $\beta$  inhibitors in yeast. *Cancer Chemother. Pharmacol.* 39: 367–375.
- West KL, Turnbull RM, Willmore E, Lakey JH, Austin CA (2002) Characterisation of the DNA-dependent ATPase activity of human DNA topoisomerase II $\beta$ : mutation of Ser165 in the ATPase domain reduces the ATPase activity and abolishes the in vivo complementation ability. *Nucleic Acids Res.* 30: 5416–5424.
- Dickey JS, Osheroff N (2005) Impact of the C-Terminal Domain of Topoisomerase II $\alpha$  on the DNA Cleavage Activity of the Human Enzyme. *Biochemistry* 44: 11546–11554.
- Jensen S, Andersen AH, Kjeldsen E, Biersack H, Olsen EHN, et al. (1996) Analysis of Functional Domain Organization in Topoisomerase II from Humans and *Saccharomyces cerevisiae*. *Mol. Cell Biol.* 16: 3866–3877.
- McClendon AK, Rodriguez AC, Osheroff N (2005) Human topoisomerase IIalpha rapidly relaxes positively supercoiled DNA: implications for enzyme action ahead of replication forks. *J. Biol. Chem.* 280: 39337–39345.
- Caron PR, Watt P, Wang JC (1994) The C-terminal domain of *Saccharomyces cerevisiae* DNA topoisomerase II. *Mol. Cell. Biol.* 14: 3197–3207.
- Shiozaki K, Yanagida M (1992) Functional dissection of the phosphorylated termini of fission yeast DNA topoisomerase II. *J. Cell Biol.* 119: 1023–1036.
- Greenwood Crenshaw D, Hsieh T-S (1993) Function of the Hydrophilic Carboxyl Terminus of Type II DNA Topoisomerase from *Drosophila melanogaster*: I In Vitro Studies. *J. Biol. Chem.* 268: 21328–21334.
- Sengupta T, Mukherjee M, Das R, Das A, Majumder HK (2005) Characterisation of the DNA-binding domain and identification of the active site residue in the 'GyrA' half of *Leishmania donovani* topoisomerase II. *Nucleic Acids Res.* 33: 2364–2373.
- Marsh KL, Willmore E, Tinelli S, Cornarotti M, Meczes EL, et al. (1996) Amsacrine-Promoted DNA Cleavage Site Determinants for the Two Human DNA Topoisomerase II Isoforms  $\alpha$  and  $\beta$ . *Biochem. Pharmacol.* 52: 1675–1685.
- Gilroy KL (2007) PhD Thesis.

## Author Contributions

Conceived and designed the experiments: CA. Performed the experiments: EM KW. Analyzed the data: KG EM KW. Contributed reagents/materials/analysis tools: CA. Wrote the paper: KG.
